# Supplementary material
Source: bioRxiv or medRxiv preprint supplement (https://www.biorxiv.org/highwire/filestream/2694/field_highwire_adjunct_files/3/009373-4.pdf)

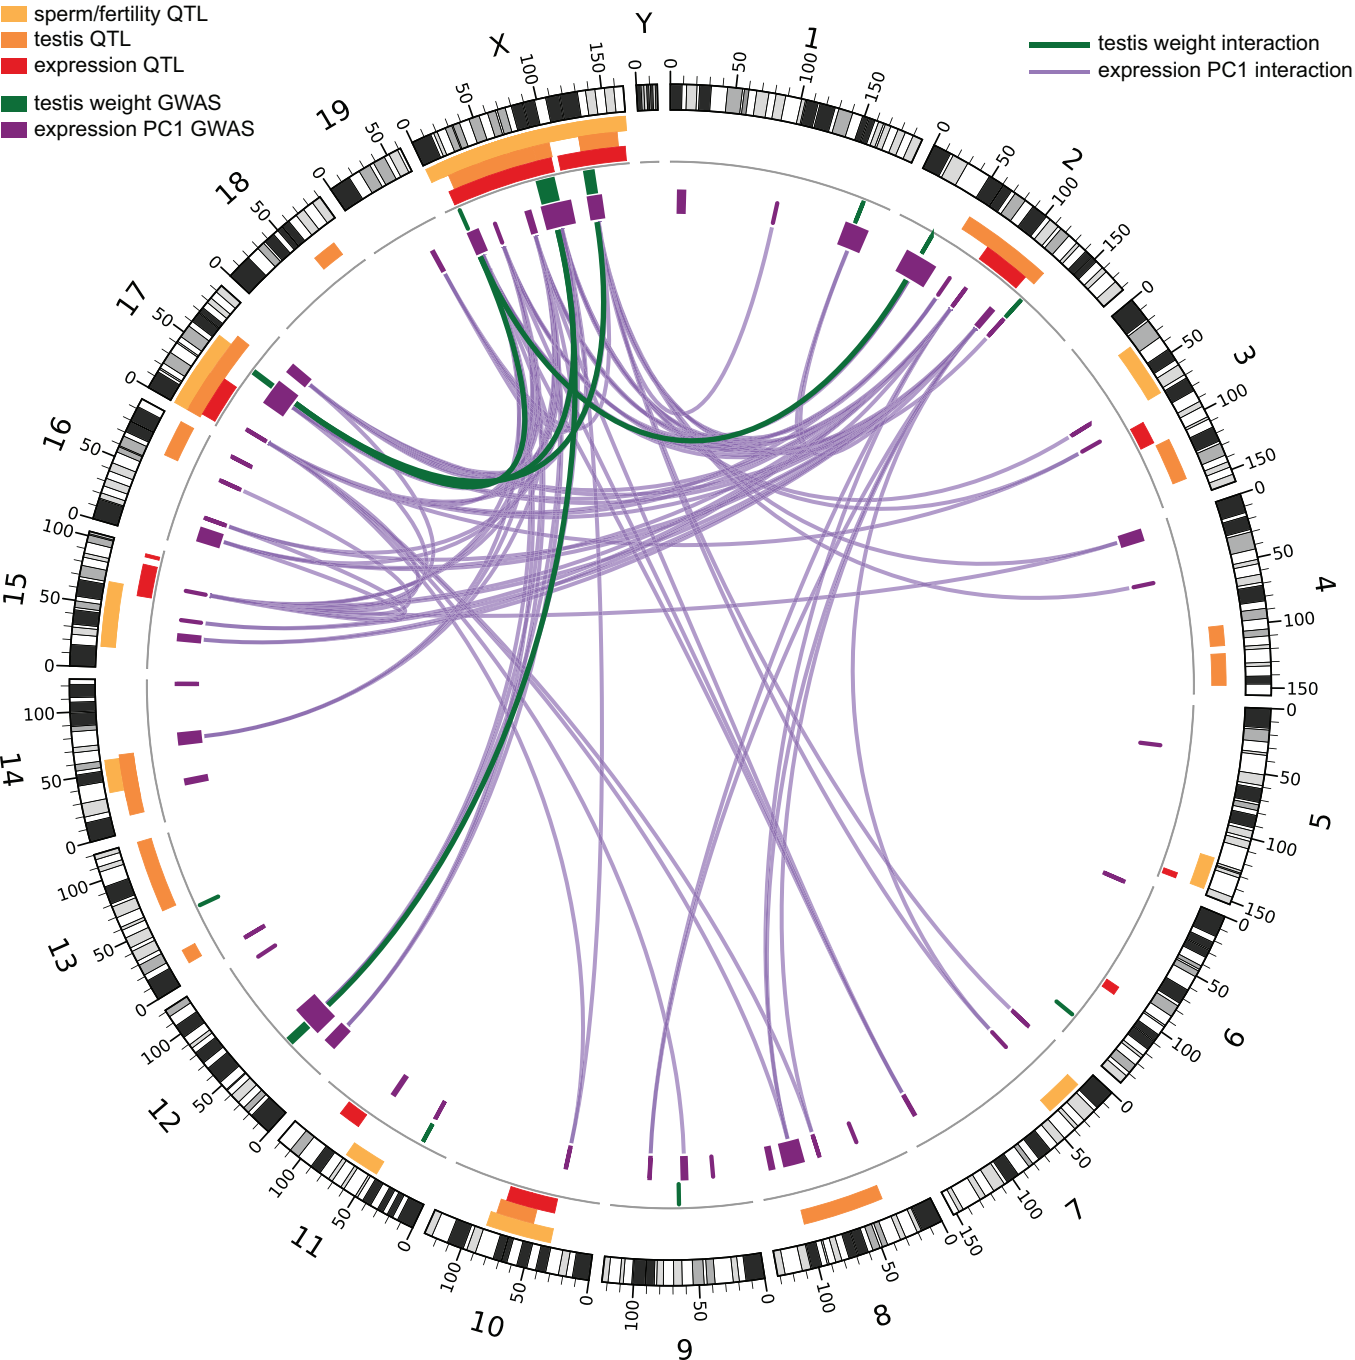

Supplement: Supplementary file [file 009373-4.pdf]
